# Supplementary material for: Optimizing Cell-Free Protein Synthesis for Increased Yield and Activity of Colicins
Source: PubMed Central journal article supplement (PMC6632115; doi:10.3390/mps2020028), 2019-04-11
Supplement: mps-02-00028-s001.pdf [file mps-02-00028-s001.pdf]

## Supplementary Information

### Optimizing Cell-Free Protein Synthesis for Increased Yield and Activity of Colicins

Xing Jin,<sup>1</sup> Weston Kightlinger,<sup>2</sup> and Seok Hoon Hong<sup>1,\*</sup>

<sup>1</sup>Department of Chemical and Biological Engineering,  
Illinois Institute of Technology, Chicago, IL 60616, USA

<sup>2</sup>Department of Chemical and Biological Engineering,  
Northwestern University, Evanston, IL 60208, USA

\*Corresponding author: shong26@iit.edu

Tel: (+1) 312 567 8950

**Supplementary Table S1.** Primers used in this study. “\*” indicates phosphorothioated bases.

| Primer   | Purpose                                               | Sequence (5' → 3')                                                                                |
|----------|-------------------------------------------------------|---------------------------------------------------------------------------------------------------|
| pJL1-F   | Amplification of pJL1 backbone for Gibson Assembly    | CAAAGCCCCGAAAGGAAGCTGAGTTG                                                                        |
| pJL1-R   |                                                       | CTTAAAGTTAAACAAAATTATTTCTAGAGGG                                                                   |
| Gacol-F  | Amplification of <i>cm</i> a gene encoding colicin M  | TTTGTTTAACTTTAAGAAGGAGATATACATATG                                                                 |
| Gacol-R  |                                                       | TTCCTTTCGGGCTTTGTTAGCAGCCGGTCGACTTA                                                               |
| ColE1-F  | Amplification of <i>cea</i> gene encoding colicin E1  | ATTTTGTTTAACTTTAAGAAGGAGATATACATATGGAAACCGCGGTAGCGTAC                                             |
| ColE1-R  |                                                       | CGGGCTTTGTTAGCAGCCGGTCGACTTATTTTTCGAACTGCGGATGGCTCCAAA<br>TCCCTAACACCTCATTATAG                    |
| ColE3-F  | Amplification of <i>ceaC</i> gene encoding colicin E3 | ATTTTGTTTAACTTTAAGAAGGAGATATACATATGAGCGGTGGCGATGGACG                                              |
| ColE3-R  |                                                       | CGGGCTTTGTTAGCAGCCGGTCGACTCATTTTTCGAACTGCGGATGGCTCCAAA<br>GATATTTCTTGATATTTTC                     |
| E3Imm-F  | Amplification of <i>imm</i> gene encoding E3 immunity | ATTTTGTTTAACTTTAAGAAGGAGATATACATATGGGACTTAAATTGG                                                  |
| E3Imm-R  |                                                       | CGGGCTTTGTTAGCAGCCGGTCGACTCATTTTTCGAACTGCGGATGGCTCCACC<br>AATCACCATC                              |
| T7Mega-F | Addition of T7 promoter                               | A*G*ATCTCGATCCC CGCAAATTAATACGACTCACTATAGGGAGACCACAACG<br>GTTTCCCTCTAGAAATAATTTTGTTTAACTTTAAGAAGG |
| TAA-R    | Addition of overlap region with T7 terminator         | TATTGCTCAGCGGTGGCAGCAGCCAACTCAGCTTCCTTTCGGGCTTTGTTAGCA<br>GCCGG                                   |
| T7Mega-R | T7 terminator addition                                | T*A*ATCAGAATTGGCTTTCAGCAAAAAACCCCTCAAGACCCGTTTAGAGGCC<br>CAAGGGGTTATGCTAGTTATTGCTCAGCGGTGGCAGC    |
| T7-Pro   | Sequence checking for colicin amplification           | TAATACGACTCACTATAGGG                                                                              |
| T7-Ter   |                                                       | GCTAGTTATTGCCTCAGCGG                                                                              |

**Supplementary Table S2.** DNA sequences of all colicin genes. T7 promoter, terminator, colicin genes, and E3 immunity gene are highlighted as blue, red, turquoise, and green, respectively. Bolded lowercase characters indicate Strep-tag sequence.

| Name                      | Size (bp) | Sequence 5' → 3'                                                                                                                                                                                                                                                                                                                                                                                                                                                                                                                                                                                                                                                                                                                                                                                                                                                                                                                                                                                                                                                                                                                                                                                                                                                                                                                                                                 |
|---------------------------|-----------|----------------------------------------------------------------------------------------------------------------------------------------------------------------------------------------------------------------------------------------------------------------------------------------------------------------------------------------------------------------------------------------------------------------------------------------------------------------------------------------------------------------------------------------------------------------------------------------------------------------------------------------------------------------------------------------------------------------------------------------------------------------------------------------------------------------------------------------------------------------------------------------------------------------------------------------------------------------------------------------------------------------------------------------------------------------------------------------------------------------------------------------------------------------------------------------------------------------------------------------------------------------------------------------------------------------------------------------------------------------------------------|
| <i>cma</i> encoding<br>M  | 1073      | <p>AGATCTCGATCCCGCGAAAT<b>TAATACGACTCACTATAGGGAG</b>ACCACAACGGTTCCCTCTAGAAATA<br/>           ATTTTGTTAACTTTAAGAAGGAGATATACATATGGAAACCTTAACTGTTTCATGCACCATCACCATCA<br/>           ACTAACTTACCAAGTTATGGCAATGGTGCATTTTCTCTTTCAGCACCGCATGTTCTGGTGGTGGACCT<br/>           CTTTGTAGTCCAGTTGTTTATAGTTTTTCCAGAGTCCAAACATGTGTCTTCAGGCTTTAACTCAACTT<br/>           GAGGATTACATCAAAAAACATGGGGCTAGCAACCCTCTCACATTGCAGATCATATCGACAAATATTG<br/>           GTTACTTCTGTAACGCCGACCGAAATCTGGTCTTCACCCTGGAATAAGCGTTTATGACGTTACCACT<br/>           TCTCAAACCAGCGCCAAGTCAATATGACTATCGCTCAATGAATATGAAACAAATGAGCGGTAATGT<br/>           CACTACACCAATTGTGGCGCTTGTCTACTATTTATGGGGTAATGGCGCTGAAAGGAGCGTTAATATCG<br/>           CCAACATTGGTCTTAAAATTTCCCTATGAAAATTAATCAGATAAAAGACATTATAAAATCTGGTGTGA<br/>           GTAGGTACATTCCCTGTTTCTACAAAGTTCACACATGCCACTGGTGATTATAATGTTATTACCGGTGCA<br/>           TATCTTGGTAATATCACACTGAAAACAGAAGGTACTTTAACTATCTCTGCCAATGGCTCCTGGACTTA<br/>           CAATGGCGTTGTTTCGTTTCATATGATGATAAATACGATTTAACGCCAGCACTCACCGTGGCGTCATCG<br/>           GAGAGTCGCTACAAGGCTCGGGGCGATGTTTTCTGGTAAAGAGTACCAGATACTGTTCTTGGTGAA<br/>           ATTCACATTAAGAAAGTGGTAAGCGAt<b>ggagccatccgcagttcgaaaa</b>TAAGTCGACCGGCTGCTAACAAAG<br/>           CCCGAAAGGAAGCTGAGTTGGCTGCTGCCACCGCTGAGCAATAACTAGCAT<b>AACCCCTTGGGGCCTC</b><br/> <b>TAAACGGGTCTTGAGGGGTTTTT</b>GCTGAAAGCCAATTCTGATTA</p> |
| <i>cea</i> encoding<br>E1 | 1826      | <p>AGATCTCGATCCCGCGAAAT<b>TAATACGACTCACTATAGGGAG</b>ACCACAACGGTTCCCTCTAGAAATA<br/>           ATTTTGTTAACTTTAAGAAGGAGATATACATATGGAAACCGCGGTAGCGTACTATAAAGATGGTGGT<br/>           CTTATGATGATAAGGGACAGGTAATTACTCTTTTGAATGGTACTCCTGACGGGAGTGGCTCTGG<br/>           CGGCGGAGGTGGAAAAGGAGGCAGTAAAAGTGAAGTTCTGCAGCTATTCATGCAACTGCTAAATGG<br/>           TCTACTGCTCAATTAAGAAAACACAGGCAGAGCAGGCTGCCCGGGCAAAGCTGCAGCGGAAGCA<br/>           CAGGCGAAAGCAAAGGCAAACAGGGATGCGCTGACTCAGCGCCTGAAGGATATCGTGAATGAGGCT<br/>           CTTTCGTCACAATGCCTCACGTACGCCTTACGCAACAGAGCTTGCTCATGCTAATAATGCAGCTATGCA<br/>           GCGGAAGACGAGCGTTTGCGCCTTGCGAAAGCAGAAGAAAAGCCCGTAAAGAAGCGGAAGCAGC<br/>           AGAAAAGGCTTTTCAGGAAGCAGAACAACGACGTAAGAGATTGAACGGGAGAAGGCTGAAACAGA<br/>           ACGCCAGTTGAAACTGGCTGAAGCTGAAGAGAAACGACTGGCTGCATTGAGTGAAGAAGCTAAAGCT<br/>           GTTGAGATCGCCAAAAAAACTTTCTGCTGCACAATCTGAAGTGGTGAATAATGGATGGAGAGATTA<br/>           AGACTCTCAATTCTCGTTTAAAGCTCCAGTATCCATGCCCGTGATGCAGAAATGAAAACGCTCGCTGGA<br/>           AAACGAAATGAACTGGCTCAGGCATCCGCTAAATATAAAGAACTGGATGAGCTGGTCAAAAAACTAT<br/>           CACCAAGAGCCAATGATCCGCTCAGAACCCTTTTTTTTGAAGCAACCAGACGACGGGTTGGGGCC<br/>           GGTAAGATTAGAGAAGAAAACAAAAACAGGTAACAGCATCAGAAACACGTATTAACCGGATAAAT</p>                                                                                                    |

---

GCTGATATAACTCAGATCCAGAAGGCTATTTCTCAGGTCAGTAATAATCGTAATGCCGGTATCGCTCG  
TGTTTCATGAAGCTGAAGAAAATTTGAAAAAAGCACAGAATAATCTCCTTAATTCACAGATTAAGGAT  
GCTGTTGATGCAACAGTTAGCTTTTATCAAACGCTGACTGAAAAATATGGTGAAAAATATTCGAAAAAT  
GGCACAGGAACCTGCTGATAAGTCTAAAGGTAAGAAAATCGGCAATGTGAATGAAGCTCTCGCTGCT  
TTTGAAAAATACAAGGATGTTTTAAATAAGAAATTCAGCAAAGCCGATCGTGATGCTATTTTTAATGC  
GTTGGCATCGGTGAAGTATGATGACTGGGCTAAACATTTAGATCAGTTTGCCAAGTACTTGAAGATTA  
CGGGGCATGTTTCTTTTGGATATGATGTGGTATCTGATATCCTAAAAATTAAGGATACAGGTGACTGG  
AAGCCACTATTTCTTACATTAGAGAAGAAAGCTGCAGATGCAGGGGTGAGTTATGTTGTTGCTTTACT  
TTTTAGCTTGCTTGCTGGAACCTACATTAGGATTTGGGGTATTGCTATTGTTACAGGAATTCTATGCTC  
CTATATTGATAAGAATAAACTTAATACTATAAATGAGGTGTTAGGGATTtggagccatccgcagttcgaaaaTAA  
GTCGACCGGCTGCTAACAAAGCCCGAAAGGAAGCTGAGTTGGCTGCTGCCACCGCTGAGCAATAACT  
AGCAT**AACCCCTTGGGGCCTCTAAACGGGTCTTGAAGGGTTTTT**GCTGAAAGCCAATTCTGATTA

---

*ceaC* encoding 1889  
E3

AGATCTCGATCCCGCGAAAT**TAATACGACTCACTATAGGGAC**ACCACAACGGTTTCCCTCTAGAAATA  
ATTTTGTTAACTTTAAGAAGGAGATATACATATGAGCGGTGGCGATGGACGCGGCCATAACACGGG  
CGCGCATAGCACAAAGTGGTAACATTAATGGTGGCCCGACCGGGCTTGGTGTAGGTGGTGGTCTTCTG  
ATGGCTCCGGATGGAGTTCGGAAAATAACCCGTGGGGTGGTGGTCCGGTAGCGGCATTCCTGGGG  
TGGTGGTTCGGTCATGGTAATGGCGGGGGGAATGGTAATCCGGTGGTGGTTCGGGAACAGGCGGT  
AATCTGTCAGCAGTAGCTGCGCCAGTGGCATTGGTTTTCCGGCACTTCCACTCCAGGAGCTGGCGG  
TCTGGCGGTCAGTATTTACGCGGGAGCATTATCGGCAGCTATTGCTGATATTATGGCTGCCCTGAAAG  
GACCGTTTAAATTTGGTCTTTGGGGGGTGGCTTTATATGGTGTATTGCCATCACAAATAGCGAAAGAT  
GACCCAATATGATGTCAAAGATTGTGACGTCATTACCCGCAGATGATATTACTGAATCACCTGTGAG  
TTCATTACCTCTCGATAAGGCAACAGTAAACGTAATGTTCGTGTTGTTGATGATGATAAAAGACGAGC  
GACAGAATATTTCCGGTTGTTTCAGGTGTTCCGATGAGTGTTCGGTGGTTGATGCAAAAACCTACCGAA  
CGTCCGGGTGTTTTTACGGCATCAATCCAGGTGCACCTGTTCTGAATATTTTCAGTTAATAACAGTACG  
CCAGCAGTACAGACATTAAGCCAGGTGTTACAAATAATACTGATAAGGATGTTCCGCCGGCAGGAT  
TTACTCAGGGTGGTAATACCAGGATGCAGTTATTCGATTCCCGAAGGACAGCGGTGCATAATGCCGTA  
TATGTTTCAGTGAGTGATGTTCTTAGCCCTGACCAGGTAACAACAGTCAAGATGAAGAAAATCGCC  
GTCAGCAGGAATGGGATGCTACGCATCCGGTTGAAGCGGCTGAGCGAAATTATGAACGCGCGCGTGC  
AGAGCTGAATCAGGCAAATGAAGATGTTGCCAGAAATCAGGAGCGACAGGCTAAAGCTGTTTCAGGTT  
TATAATTCGCGTAAAAGCGAACTTGATGCAGCGAATAAACTCTTGCTGATGCAATAGCTGAAATAA  
AACAATTTAATCGATTTGCCCATGACCCAATGGCTGGCGGTACAGAATGTGGCAAATGGCCGGGCTT  
AAAGCCCAGCGGGCGCAGACGGATGTAATAATAAGCAGGCTGCATTTGATGCTGCTGCAAAAAGAGA  
AGTCAGATGCTGATGCTGCATTGAGTTCTGCTATGGAAAGCAGGAAGAAGAAGAAGATAAGAAAA  
GGAGTGCTGAAAATAATTTAAACGATGAAAAGAATAAGCCCAGAAAAGGTTTTAAAGATTACGGGCA  
TGATTATCATCCAGCTCCGAAAACCTGAGAATATTAAGGGCTTGGTGTCTTAAGCCTGGGATACCAA  
AAACACCAAAGCAGAATGGTGGTGGAAAACGCAAGCGCTGGACTGGAGATAAAGGGCGTAAGATTT

---

|                  |      |                                                                                                                                                                                                                                                                                                                                                                                                                                                                                                                                                                                                                                                                                                                                                                                                                                                                                                                                                                                                                                                                                                                                                                                                                                                                                                                                                                                                                                                                                                                                                                                                                                                                                                                                                                                                                                                                                                                                                                                                                                                                                                                                                                                                                                                                                                                                                                                                      |
|------------------|------|------------------------------------------------------------------------------------------------------------------------------------------------------------------------------------------------------------------------------------------------------------------------------------------------------------------------------------------------------------------------------------------------------------------------------------------------------------------------------------------------------------------------------------------------------------------------------------------------------------------------------------------------------------------------------------------------------------------------------------------------------------------------------------------------------------------------------------------------------------------------------------------------------------------------------------------------------------------------------------------------------------------------------------------------------------------------------------------------------------------------------------------------------------------------------------------------------------------------------------------------------------------------------------------------------------------------------------------------------------------------------------------------------------------------------------------------------------------------------------------------------------------------------------------------------------------------------------------------------------------------------------------------------------------------------------------------------------------------------------------------------------------------------------------------------------------------------------------------------------------------------------------------------------------------------------------------------------------------------------------------------------------------------------------------------------------------------------------------------------------------------------------------------------------------------------------------------------------------------------------------------------------------------------------------------------------------------------------------------------------------------------------------------|
|                  |      | ATGAGTGGGATTCTCAGCATGGTGAGCTTGAGGGGTATCGTGCCAGTGATGGTCAGCATCTTGCTCA<br>TTTGACCCTAAAACAGGCAATCAGTTGAAAGGTCCAGATCCGAAACGAAATATCAAGAAATATCTTT<br>GAGTCGACCGGCTGCTAACAAAGCCCGAAAGGAAGCTGAGTTGGCTGCTGCCACCGCTGAGCAATAA<br>CTAGCAT <b>AACCCCTTGGGGCCTCTAAACGGGTCTTGAGGGGTTTTT</b> GCTGAAAGCCAATTCTGATTA                                                                                                                                                                                                                                                                                                                                                                                                                                                                                                                                                                                                                                                                                                                                                                                                                                                                                                                                                                                                                                                                                                                                                                                                                                                                                                                                                                                                                                                                                                                                                                                                                                                                                                                                                                                                                                                                                                                                                                                                                                                                                                    |
| E3+Imm<br>operon | 2156 | AGATCTCGATCCCGCGAAAT <b>TAATACGACTCACTATAGGGAG</b> ACCACAACGGTTTCCCTCTAGAAATA<br>ATTTTGTTTAACTTTAAGAAGGAGATATACATATGAGCGGTGGCGATGGACGCGGCCATAACACGGG<br>CGCGCATAGCACAAGTGGTAACATTAATGGTGGCCGACCGGGCTTGGTGTAGGTGGTGGTCTTCTG<br>ATGGCTCCGGATGGAGTTCGGAAAATAACCCGTGGGGTGGTGGTTCCGGTAGCGGCATTCACTGGGG<br>TGGTGGTTCCGGTCATGGTAATGGCGGGGGGAATGGTAATCCGGTGGTGGTTCGGGAACAGGCGGT<br>AATCTGTCAGCAGTAGCTGCGCCAGTGGCATTGGTTTTCCGGCACTTCCACTCCAGGAGCTGGCGG<br>TCTGGCGGTCAGTATTCAGCGGGAGCATTATCGGCAGCTATTGCTGATATTATGGCTGCCCTGAAAG<br>GACCGTTTAAATTTGGTCTTTGGGGGTGGCTTTATATGGTGTATTGCCATCACAAATAGCGAAAGAT<br>GACCCAATATGATGTCAAAGATTGTGACGTCATTACCCGCAGATGATATTACTGAATCACCTGTCAG<br>TTCATTACCTCTCGATAAGGCAACAGTAAACGTAATGTTCTGTGTTGTTGATGATGTAAAAGACGAGC<br>GACAGAATATTTGGTGTTCAGGTGTTCCGATGAGTGTCCGGTGGTTGATGCAAAACCTACCGAA<br>CGTCCGGGTGTTTTACGGCATCAATCCAGGTGCACCTGTTCTGAATATTTCAAGTTAATAACAGTACG<br>CCAGCAGTACAGACATTAAGCCAGGTGTTACAAATAATACTGATAAGGATGTTCCGCCGGCAGGAT<br>TACTCAGGGTGGTAATACCAGGGATGCAGTTATTCGATTCCCGAAGGACAGCGGTCATAATGCCGTA<br>TATGTTTCAGTGAGTGATGTTCTTAGCCCTGACCAGGTAAAACAACGTCAAGATGAAGAAAATCGCC<br>GTCAGCAGGAATGGGATGCTACGCATCCGGTTGAAGCGGTGAGCGAAATTATGAACGCGCGCGTGC<br>AGAGCTGAATCAGGCAAATGAAGATGTTGCCAGAAATCAGGAGCGACAGGCTAAAGCTGTTCAAGTT<br>TATAATTCGCGTAAAAGCGAACTTGATGCAGCGAATAAACTCTTGCTGATGCAATAGCTGAAATAA<br>AACAATTTAATCGATTTGCCCATGACCCAATGGCTGGCGGTACAGAAATGTGGCAAATGGCCGGGCTT<br>AAAGCCCAGCGGGCGCAGACGGATGTAATAATAAGCAGGCTGCATTTGATGCTGCTGCAAAAGAGA<br>AGTCAGATGCTGATGCTGCATTGAGTTCTGCTATGGAAAGCAGGAAGAAGAAGAAGATAAGAAAA<br>GGAGTGCTGAAAATAATTTAAACGATGAAAAGAATAAGCCAGAAAAGGTTTTAAAGATTACGGGCA<br>TGATTATCATCCAGCTCCGAAAACCTGAGAATATTAAGGGCTTGGTGATCTTAAGCCTGGGATACCAA<br>AAACACCAAAGCAGAATGGTGGTGGAAAACGCAAGCGCTGGACTGGAGATAAAGGGCGTAAGATTT<br>ATGAGTGGGATTCTCAGCATGGTGAGCTTGAGGGGTATCGTGCCAGTGATGGTCAGCATCTTGCTCA<br>TTTGACCCTAAAACAGGCAATCAGTTGAAAGGTCCAGATCCGAAACGAAATATCAAGAAATATCTTT<br>GAGAGGAAGTT <b>ATGGGACTTAAATTGGATTTAACTTGGTTTTGATAAAAAGTACAGAAGATTTTAAAGG</b><br><b>TGAGGAGTATTCAAAGATTTTGGAGATGACGGTTCAGTTATGGAAAAGTCTAGGTGTGCCTTTTAAAG</b><br><b>ATAATGTTAATAACGGTTGCTTTGATGTTATAGCTGAATGGGTACCTTTGCTACAACCATACTTTAATC</b><br><b>ATCAAATTGATATTTCCGATAATGAGTATTTTGTTCGTTTGATTATCGTGATGGTGAATTGGTGA</b> GTCG<br>ACCGGCTGCTAACAAAGCCCGAAAGGAAGCTGAGTTGGCTGCTGCCACCGCTGAGCAATAACTAGCA<br>T <b>AACCCCTTGGGGCCTCTAAACGGGTCTTGAGGGGTTTTT</b> GCTGAAAGCCAATTCTGATTA |

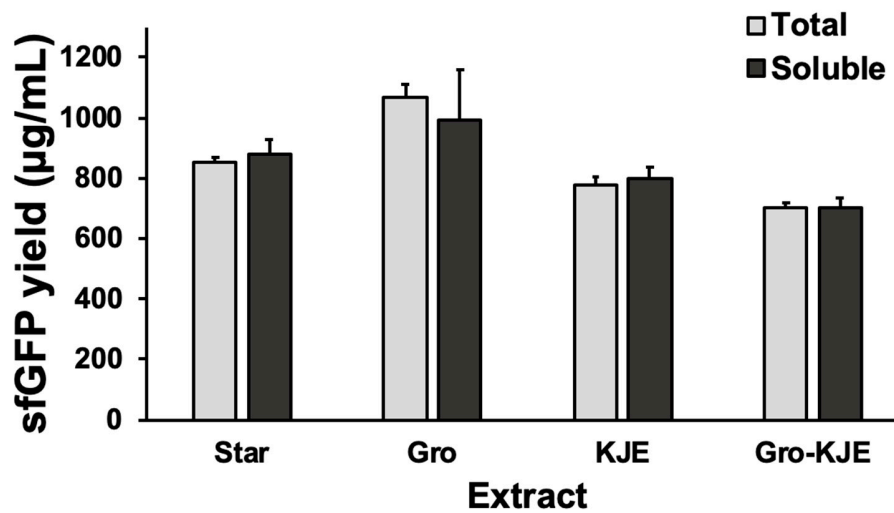

**Supplementary Figure S1.** Overall CFPS capacity of chaperone-enriched extracts. Total and soluble protein yields of sfGFP produced in chaperone-enriched extracts determined by  $^{14}\text{C}$ -Leu scintillation counting at 30°C for 20 h.

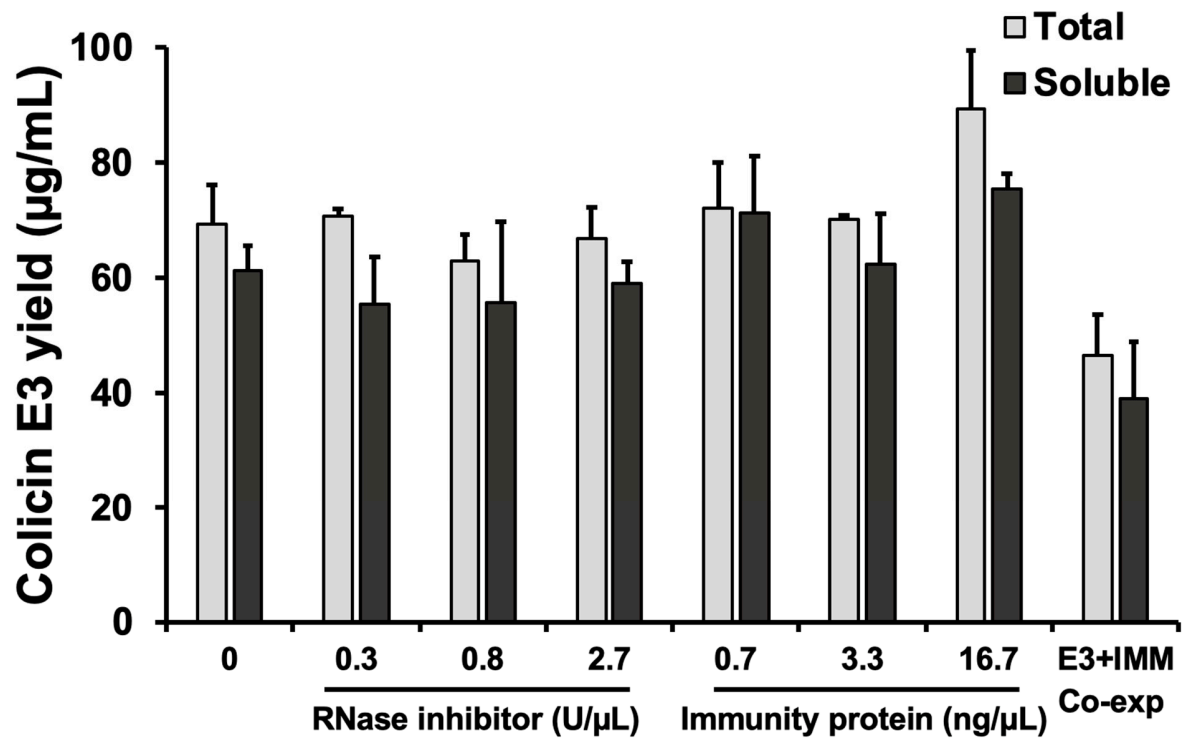

**Supplementary Figure S2.** Effect of additives in colicin E3 yield. Yield of cell-free synthesized colicin E3 with different concentrations of RNase inhibitor and E3 immunity protein and with co-expression (co-exp) of immunity protein. Error bars indicate standard deviation from three independent CFPS reactions.
